# Supplementary material
Source: Frontiers journal article supplement (https://www.frontiersin.org/articles/172195)
Supplement: Image_1.PDF [file Image_1.PDF]

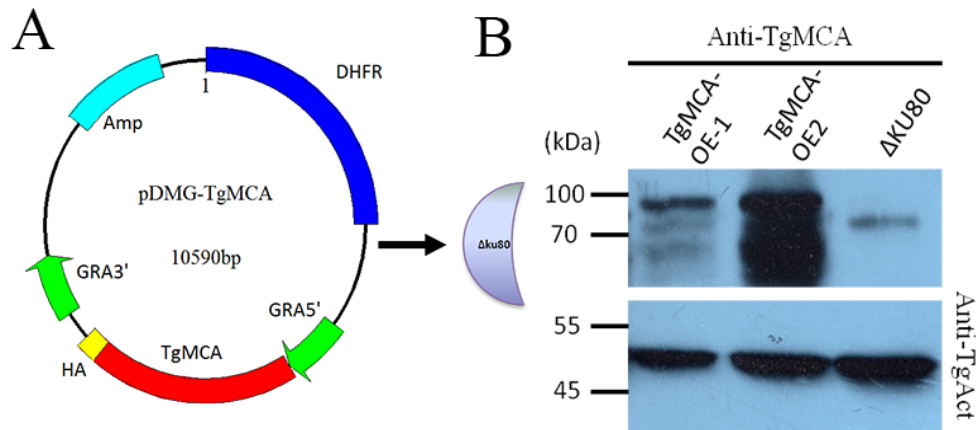

Fig. S1 (A) Schematic of plasmid design about pDMG-*TgMCA*. A over expression plasmid pDMG-*TgMCA* was constructed to insert the genome of RH $\Delta$ ku80 to overexpress *TgMCA*. (B) Western blot analysis of *TgMCA* over expression using anti-r*TgMCA* antibody on total extracts from  $\Delta$ ku80 and two *TgMCA* OE clones, and *TgActin* was used as control.
